# Supplementary material
Source: PubMed Central journal article supplement (PMC4271540)
Supplement: NIHMS642950-supplement-1.pdf [file NIHMS642950-supplement-1.pdf]

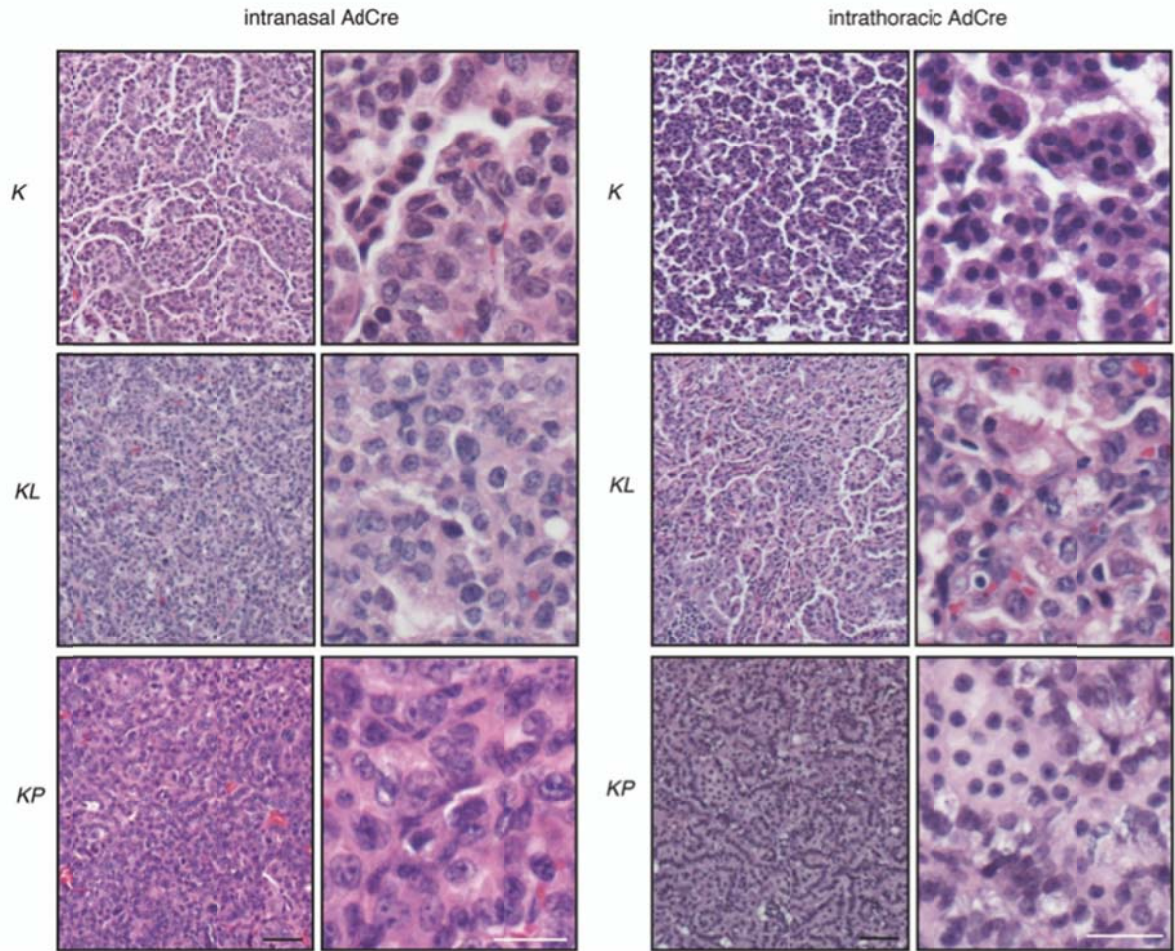

**Supplementary Figure 1. Histopathological comparison of intranasal and intrathoracic induced NSCLC in *K*, *KL*, and *KP* mice.** Representative H&E staining of lung adenocarcinomas from *K*, *KL*, and *KP* mice (3 mice per genotype) virally infected with intranasal AdCre (left panels) or intrathoracic AdCre (right panels). Black scale bar = 50  $\mu$ m. White scale bar = 25  $\mu$ m.

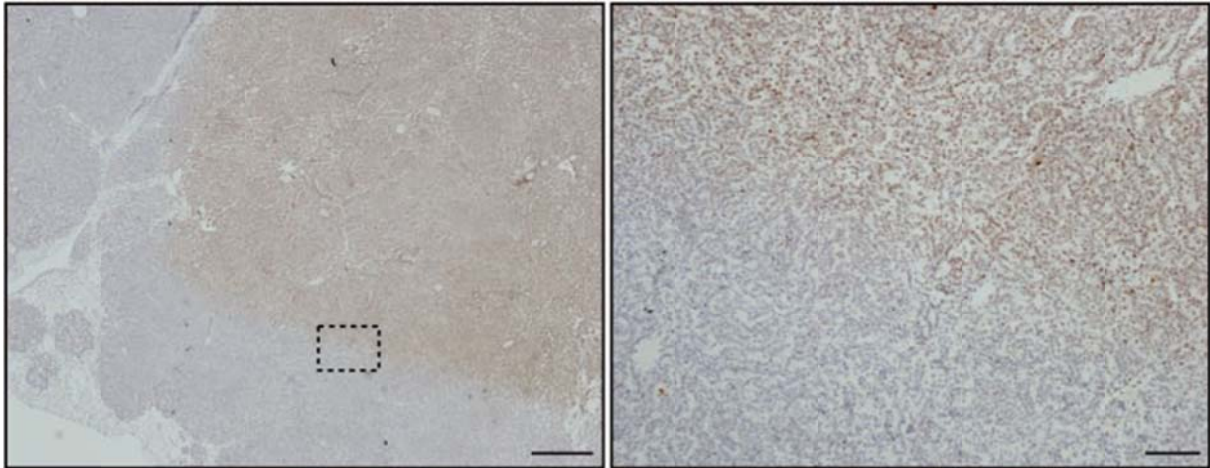

**Supplementary Figure 2. Target validation after image-guided irradiation.** Representative immunohistochemical analysis of solitary lung tumors from *K* mice (n=3). Lungs were harvested 30 minutes after a single dose of 8 Gy using the 5x5 mm collimator. Sections were stained with antibodies against  $\gamma$ -H2AX to visualize DNA double strand breaks induced by IR. Distinct differentiation between stained and unstained tumor tissue validates precise irradiation. Scale bar left panel = 500  $\mu$ m. Scale bar right panel = 100  $\mu$ m.
